# Supplementary material for: Incidence of Guillain-Barré Syndrome (GBS) in Latin America and the Caribbean before and during the 2015–2016 Zika virus epidemic: A systematic review and meta-analysis
Source: PubMed Central journal article supplement (PMC6730933; doi:10.1371/journal.pntd.0007622), 2019-08-26

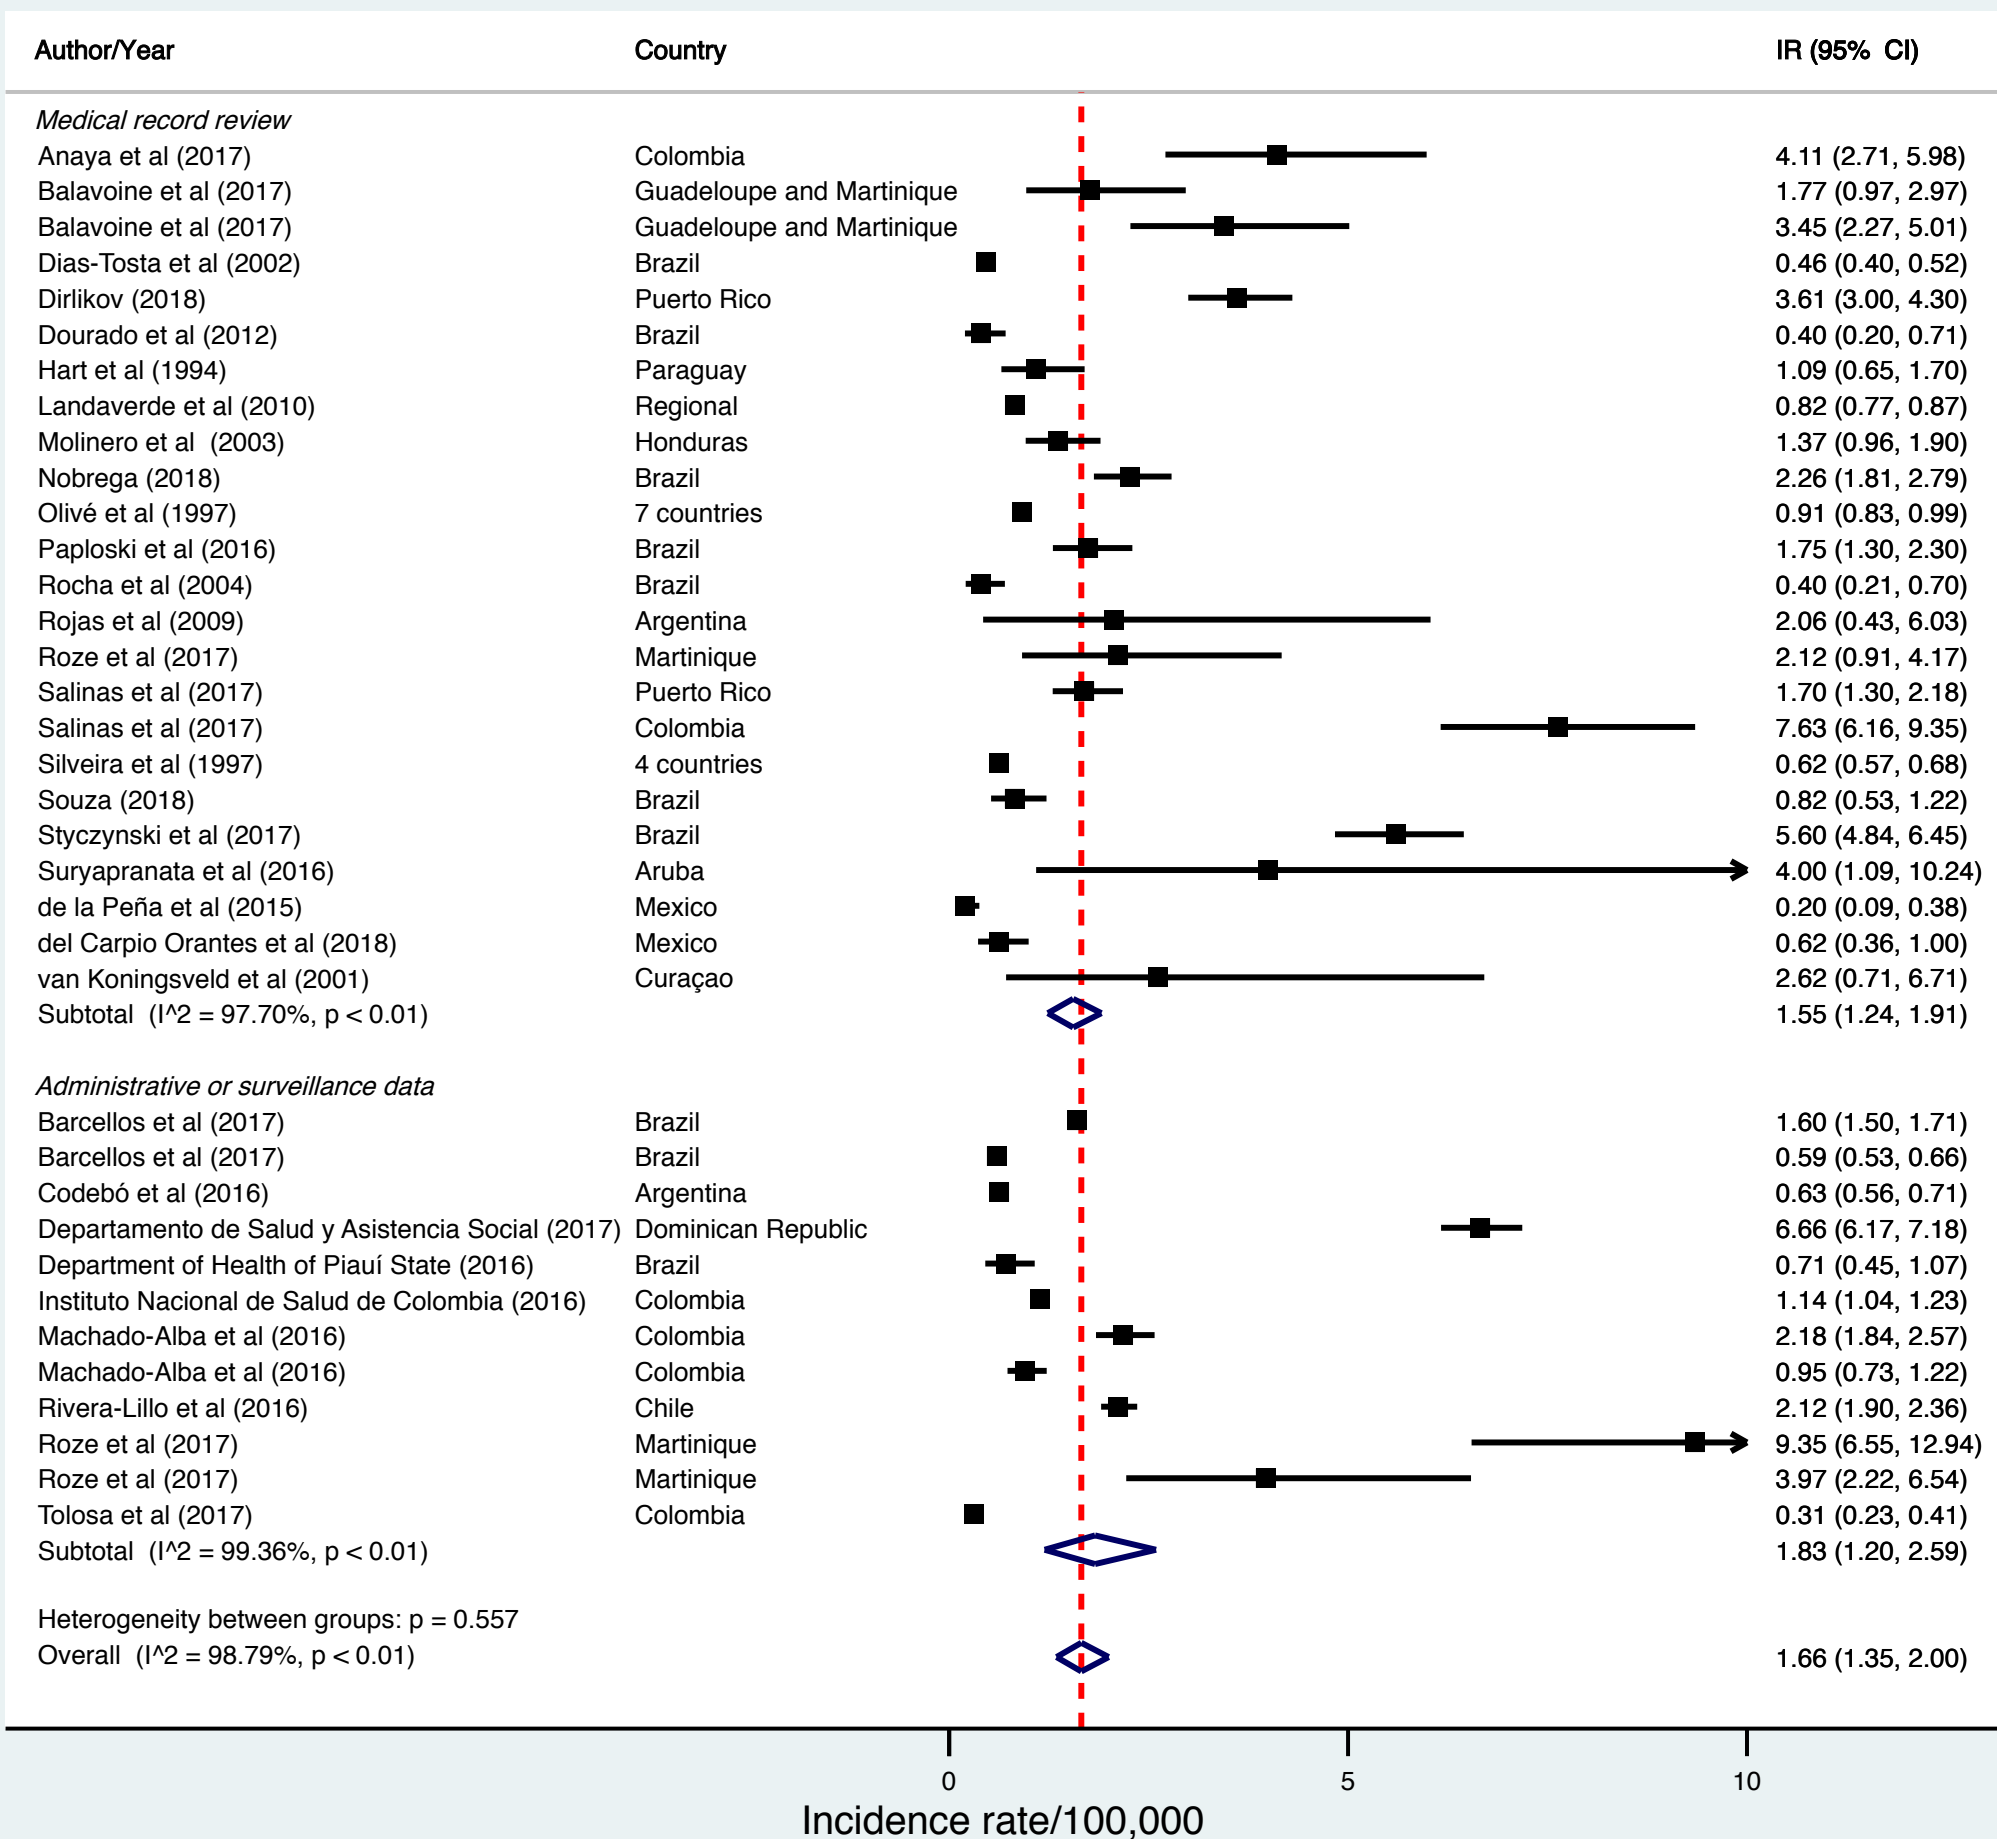

Supplement: pntd.0007622.s004.pdf [file pntd.0007622.s004.pdf]
