# Supplementary material for: Incidence of Guillain-Barré Syndrome (GBS) in Latin America and the Caribbean before and during the 2015–2016 Zika virus epidemic: A systematic review and meta-analysis
Source: PubMed Central journal article supplement (PMC6730933; doi:10.1371/journal.pntd.0007622), 2019-08-26
Supplement: pntd.0007622.s005.pdf [file pntd.0007622.s005.pdf]

|                                             | 1. Are the methods explained in sufficient detail? | 2. Was an acceptable case definition used in the study? (diagnosis certainty) | 3. Was risk of case detection bias (numerator(s) for GBS incidence) low? | 4. Was the population (denominator(s) for GBS incidence) (e.g. population, hospital catchment area, etc.) clearly specified? | 5. Summary item on the overall risk of study bias |
|---------------------------------------------|----------------------------------------------------|-------------------------------------------------------------------------------|--------------------------------------------------------------------------|------------------------------------------------------------------------------------------------------------------------------|---------------------------------------------------|
| Anaya et al (2017)                          | LOW                                                | LOW                                                                           | LOW                                                                      | LOW                                                                                                                          | LOW                                               |
| Balavoine et al (2017)                      | LOW                                                | HIGH                                                                          | LOW                                                                      | LOW                                                                                                                          | LOW                                               |
| Barcellos et al (2017)                      | LOW                                                | HIGH                                                                          | LOW                                                                      | LOW                                                                                                                          | LOW                                               |
| Codebó et al (2016)                         | LOW                                                | LOW                                                                           | LOW                                                                      | LOW                                                                                                                          | LOW                                               |
| de la Peña et al (2015)                     | LOW                                                | LOW                                                                           | LOW                                                                      | LOW                                                                                                                          | LOW                                               |
| del Carpio Orantes et al (2018)             | LOW                                                | LOW                                                                           | LOW                                                                      | LOW                                                                                                                          | LOW                                               |
| Department of Health of Paiuí State (2016)  | HIGH                                               | LOW                                                                           | LOW                                                                      | LOW                                                                                                                          | LOW                                               |
| Dias-Tosta et al (2002)                     | LOW                                                | LOW                                                                           | LOW                                                                      | LOW                                                                                                                          | LOW                                               |
| Dirlikov (2018)                             | LOW                                                | LOW                                                                           | LOW                                                                      | LOW                                                                                                                          | LOW                                               |
| Dourado et al (2012)                        | LOW                                                | LOW                                                                           | LOW                                                                      | LOW                                                                                                                          | LOW                                               |
| Esack (2010)                                | HIGH                                               | LOW                                                                           | LOW                                                                      | HIGH                                                                                                                         | HIGH                                              |
| Hart et al (1994)                           | LOW                                                | LOW                                                                           | LOW                                                                      | LOW                                                                                                                          | LOW                                               |
| Instituto Nacional de Salud Colombia (2016) | HIGH                                               | LOW                                                                           | LOW                                                                      | LOW                                                                                                                          | LOW                                               |
| Landaverde et al (2010)                     | LOW                                                | LOW                                                                           | LOW                                                                      | LOW                                                                                                                          | LOW                                               |
| Machado-Alba et al (2016)                   | LOW                                                | HIGH                                                                          | LOW                                                                      | LOW                                                                                                                          | LOW                                               |
| Mazia (1997)                                | HIGH                                               | LOW                                                                           | LOW                                                                      | HIGH                                                                                                                         | HIGH                                              |
| Molinero et al (2003)                       | LOW                                                | LOW                                                                           | LOW                                                                      | LOW                                                                                                                          | LOW                                               |
| Nobrega (2018)                              | LOW                                                | LOW                                                                           | LOW                                                                      | LOW                                                                                                                          | LOW                                               |
| Núñez R et al (2017)                        | HIGH                                               | LOW                                                                           | LOW                                                                      | LOW                                                                                                                          | LOW                                               |
| Olivé et al (1997)                          | LOW                                                | LOW                                                                           | LOW                                                                      | LOW                                                                                                                          | LOW                                               |
| Paploski et al (2016)                       | LOW                                                | HIGH                                                                          | LOW                                                                      | LOW                                                                                                                          | LOW                                               |
| Ramírez-Zamora (2009)                       | LOW                                                | HIGH                                                                          | LOW                                                                      | HIGH                                                                                                                         | HIGH                                              |
| Rivera-Lillo et al (2016)                   | LOW                                                | HIGH                                                                          | LOW                                                                      | LOW                                                                                                                          | LOW                                               |
| Rocha et al (2004)                          | LOW                                                | LOW                                                                           | LOW                                                                      | LOW                                                                                                                          | LOW                                               |
| Rojas et al (2009)                          | HIGH                                               | LOW                                                                           | LOW                                                                      | LOW                                                                                                                          | LOW                                               |
| Roze et al (2017)                           | LOW                                                | LOW                                                                           | LOW                                                                      | LOW                                                                                                                          | LOW                                               |
| Salinas, Major et al (2017)                 | LOW                                                | LOW                                                                           | LOW                                                                      | LOW                                                                                                                          | LOW                                               |
| Salinas, Walteros et al (2017)              | HIGH                                               | LOW                                                                           | LOW                                                                      | LOW                                                                                                                          | LOW                                               |
| Santos (2009)                               | HIGH                                               | LOW                                                                           | LOW                                                                      | LOW                                                                                                                          | LOW                                               |
| Silveira et al (1997)                       | LOW                                                | LOW                                                                           | LOW                                                                      | LOW                                                                                                                          | LOW                                               |
| Souza (2018)                                | LOW                                                | LOW                                                                           | LOW                                                                      | LOW                                                                                                                          | LOW                                               |
| Styczynski et al (2017)                     | LOW                                                | LOW                                                                           | LOW                                                                      | LOW                                                                                                                          | LOW                                               |
| Suryapranata et al (2016)                   | LOW                                                | LOW                                                                           | LOW                                                                      | LOW                                                                                                                          | LOW                                               |
| Tolosa et al (2017)                         | LOW                                                | HIGH                                                                          | LOW                                                                      | LOW                                                                                                                          | LOW                                               |
| van Koningsveld et al (2001)                | LOW                                                | LOW                                                                           | LOW                                                                      | LOW                                                                                                                          | LOW                                               |
| Webster-Kerr (2016)                         | HIGH                                               | LOW                                                                           | LOW                                                                      | LOW                                                                                                                          | HIGH                                              |

Risk of bias:

|        |
|--------|
| LOW    |
| MEDIUM |
| HIGH   |
